# Supplementary material for: bric à brac (bab), a central player in the gene regulatory network that mediates thermal plasticity of pigmentation in Drosophila melanogaster
Source: PLoS Genet. 2018 Aug 1;14(8):e1007573. doi: 10.1371/journal.pgen.1007573 (PMC6089454; doi:10.1371/journal.pgen.1007573)
Supplement: S1 Dataset — Values of pigmentation intensities in A4, A5, A6 and A7 segments of Pale and Dark females at 18°C, 25°C and 29°C (n = 10 per condition). Nomenclature of the individuals: name of the line (D/P), temperature (18/25/29), number (1 to 10). (XLSX) [file pgen.1007573.s013.xlsx]

## Sheet: Sheet1
Individual	A4	A5	A6	A7
D181	102.333	110.308	139.092	139.809
D182	110.609	114.764	139.663	128.285
D183	106.692	111.522	150.226	134.334
D184	101.366	111.481	142.878	133.054
D185	97.749	106.023	146.218	133.011
D186	102.318	111.666	142.946	142.716
D187	106.58	114.008	148.825	138.228
D188	114.536	119.38	148.205	132.098
D189	112.508	109.338	146.728	141.64
D1810	112.743	121.881	156.805	138.912
D251	106.805	107.97	140.576	126.144
D252	86.62	96.304	132.112	124.092
D253	94.967	97.536	135.825	116.66
D254	78.497	85.323	124.639	116.44
D255	92.436	86.617	117.35	112.013
D256	88.086	89.964	128.649	124.008
D257	95.216	97.235	127.047	118.96
D258	90.427	91.779	120.18	113.115
D259	78.009	87.836	117.18	116.394
D2510	95.235	100.539	131.25	127.996
D291	100.365	102.952	125.618	98.453
D292	89.921	95.474	122.809	86.463
D293	100.169	101.388	127.659	105.441
D294	88.594	90.499	118.611	86.125
D295	90.74	91.026	116.742	104.354
D296	89.839	94.543	117.252	93.655
D297	91.232	94.837	124.404	89.261
D298	102.189	99.71	122.859	85.861
D299	101.452	101.432	124.799	84.212
D2910	90.731	93.163	124.606	97.444
P181	105.778	111.189	125.465	109.838
P182	99.543	97.357	114.646	94.41
P183	96.78	98.652	111.272	100.479
P184	97.793	97.091	122.666	90.124
P185	97.008	99.676	110.451	92.837
P186	99.295	103.778	112.297	80.708
P187	107.273	109.981	129.362	104.044
P188	89.414	99.32	123.328	96.769
P189	98.653	104.779	126.8	99.517
P1810	94.795	94.673	118.224	99.093
P251	88.193	87.371	78.883	55.849
P252	83.479	88.244	77.435	66.98
P253	96.215	88.692	70.354	59.147
P254	93.643	83.11	68.478	53.385
P255	94.607	93.229	80.356	63.147
P256	88.93	87.791	73.404	61.123
P257	86.664	82.743	66.997	54.838
P258	88.575	89.969	75.312	53.677
P259	89.922	89.85	73.279	54.82
P2510	89.834	92.806	85.994	65.753
P291	100.11	97.771	88.897	58.275
P292	86.261	81.483	70.576	58.891
P293	86.176	87.425	80.015	59.556
P294	96.043	92.664	82.85	64.919
P295	100.707	95.927	80.747	55.057
P296	94.939	93.406	80.692	53.093
P297	91.245	73.556	56.508	45.796
P298	92.294	87.032	79.369	65.655
P299	88.792	89.412	83.691	62.985
P2910	95.86	92.893	82.744	60.923
